# Supplementary material for: Microwave-Assisted Synthesis, Biological Activity Evaluation, Molecular Docking, and ADMET Studies of Some Novel Pyrrolo [2,3-b] Pyrrole Derivatives
Source: MDPI journal article supplement (doi:10.3390/molecules27072061), 2022-03-23
Supplement: s1 [file s1]

M-4  
proton\_su DMSO {C:\nmr-data} Student 9

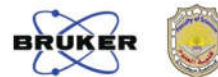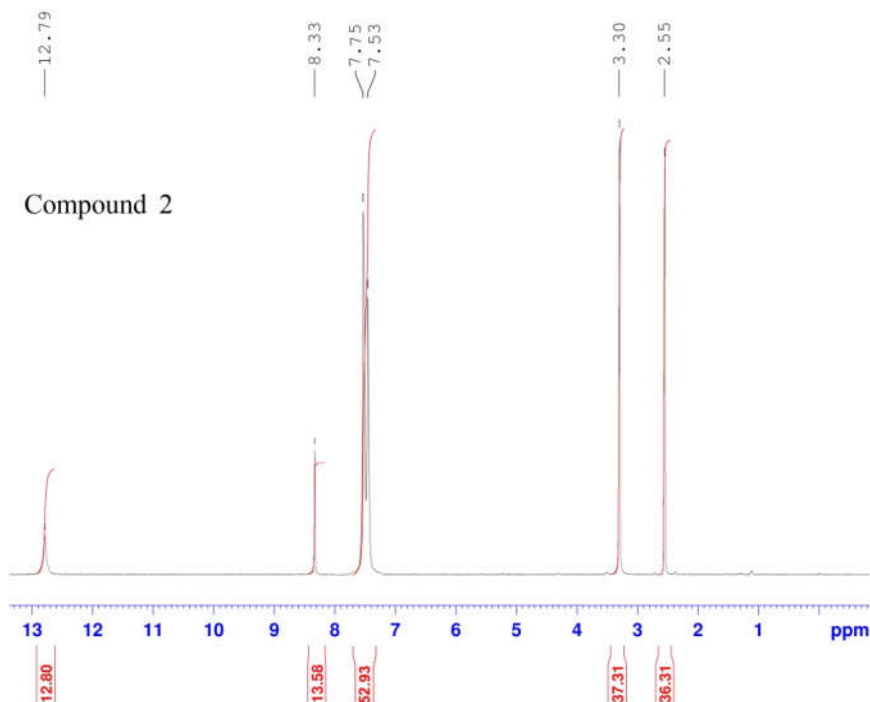

Current Data Parameters  
NAME Feb28-2017  
EXPNO 290  
PROCNO 1

F2 - Acquisition Parameters  
Date\_ 20170228  
Time 16.17  
INSTRUM spect  
PROBHD 5 mm PABBO BB/  
PULPROG zg30  
TD 65536  
SOLVENT DMSO  
NS 50  
DS 2  
SWH 8012.820 Hz  
FIDRES 0.122266 Hz  
AQ 4.0894465 sec  
RG 199.04  
DW 62.400 usec  
DE 6.50 usec  
TE 313.1 K  
D1 1.0000000 sec  
TD0 1

===== CHANNEL f1 =====  
SFO1 400.1324710 MHz  
NUC1 1H  
P1 12.00 usec  
PLW1 22.00000000 W

F2 - Processing parameters  
SI 65536  
SF 400.1299827 MHz  
WDW EM  
SSB 0  
LB 0.30 Hz  
GB 0  
PC 1.00

MP-1  
c13\_su DMSO {C:\nmr-data} Student 13

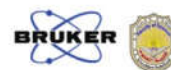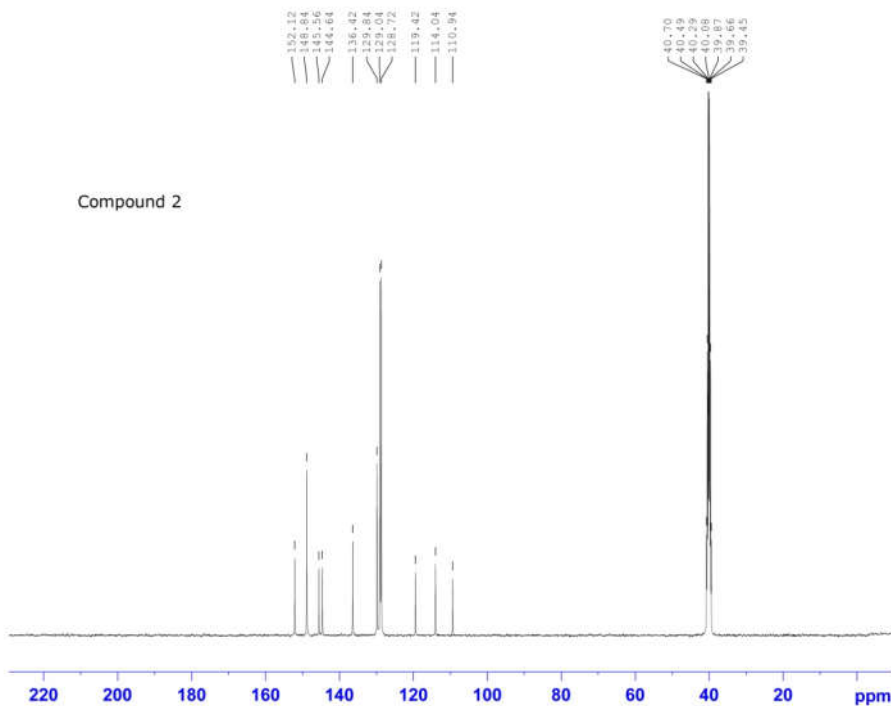

Current Data Parameters  
NAME Jan17-2018  
EXPNO 350  
PROCNO 1

F2 - Acquisition Parameters  
Date\_ 20180118  
Time 0.15  
INSTRUM spect  
PROBHD 5 mm PABBO BB/  
PULPROG zgpg30  
TD 65536  
SOLVENT DMSO  
NS 1200  
DS 4  
SWH 24038.461 Hz  
FIDRES 0.366798 Hz  
AQ 1.3631488 sec  
RG 100.43  
DW 20.800 usec  
DE 6.50 usec  
TE 308.1 K  
D1 2.00000000 sec  
D11 0.03000000 sec  
TD0 1

===== CHANNEL f1 =====  
SFO1 100.6238364 MHz  
NUC1 13C  
P1 9.50 usec  
PLW1 56.00000000 W

===== CHANNEL f2 =====  
SFO2 400.1316005 MHz  
NUC2 1H  
CFDPRG[2] waltz16  
PCPD2 90.00 usec  
PLW2 22.00000000 W  
PLW12 0.41091001 W  
PLW13 0.33284000 W

F2 - Processing parameters  
SI 32768  
SF 100.6127690 MHz  
WDW EM  
SSB 0  
LB 6.00 Hz  
GB 0  
PC 1.40

M-55  
proton\_su DMSO {C:\nmr-data} Student 6

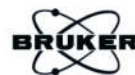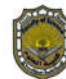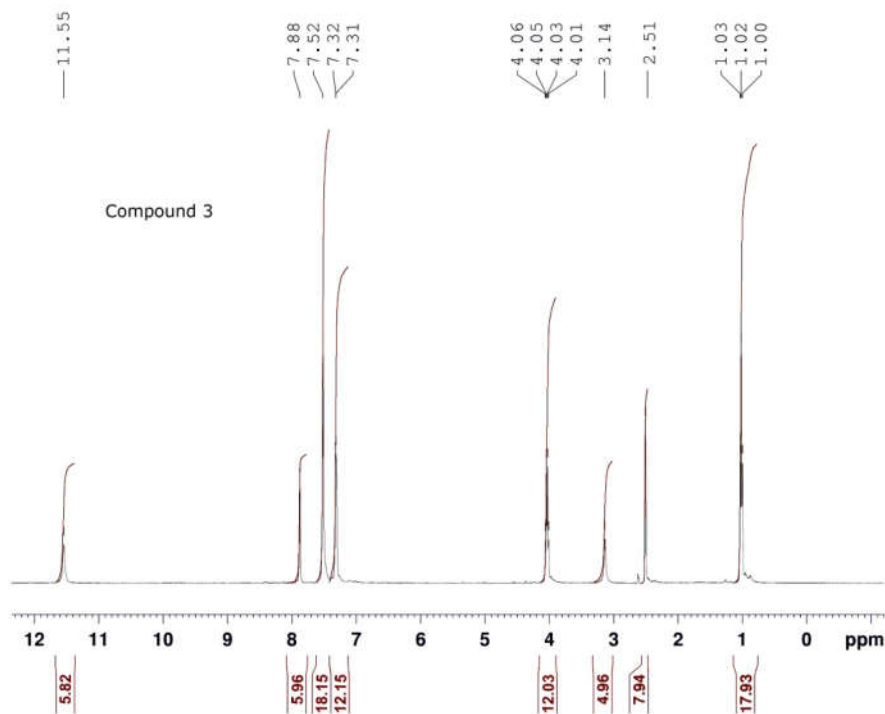

Current Data Parameters  
NAME Oct31-2017  
EXPNO 90  
PROCNO 1

F2 - Acquisition Parameters  
Date\_ 20171031  
Time 11.00  
INSTRUM spect  
PROBHD 5 mm PABBO BB/  
PULPROG zg30  
TD 65536  
SOLVENT DMSO  
NS 20  
DS 2  
SWH 8012.820 Hz  
FIDRES 0.122266 Hz  
AQ 4.0894465 sec  
RG 199.04  
DW 62.400 usec  
DE 6.50 usec  
TE 333.1 K  
D1 1.00000000 sec  
TD0 1

===== CHANNEL f1 =====  
SFO1 400.1324710 MHz  
NUC1 1H  
P1 12.00 usec  
PLW1 22.00000000 W

F2 - Processing parameters  
SI 65536  
SF 400.1300000 MHz  
WDW EM  
SSB 0  
LB 0.30 Hz  
GB 0  
PC 1.00

M-55  
c13\_su DMSO {C:\nmr-data} Student 13

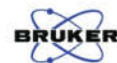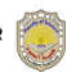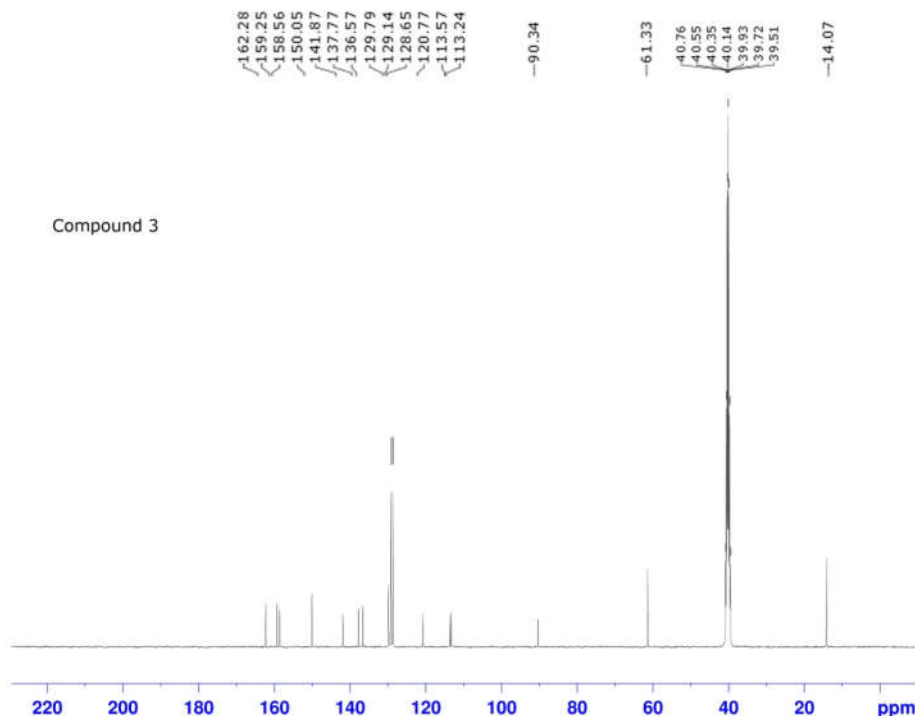

Current Data Parameters  
NAME Feb05-2018  
EXPNO 40  
PROCNO 1

F2 - Acquisition Parameters  
Date\_ 20180205  
Time 23.33  
INSTRUM spect  
PROBHD 5 mm PABBO BB/  
PULPROG zgpg30  
TD 65536  
SOLVENT DMSO  
NS 3500  
DS 4  
SWH 24038.461 MHz  
FIDRES 0.366798 MHz  
AQ 1.3631488 sec  
RG 175.84  
DW 20.800 usec  
DE 6.50 usec  
TE 318.1 K  
D1 2.00000000 sec  
D11 0.03000000 sec  
TD0 1

===== CHANNEL f1 =====  
SFO1 100.6238364 MHz  
NUC1 13C  
P1 9.50 usec  
PLW1 56.00000000 W

===== CHANNEL f2 =====  
SFO2 400.1316005 MHz  
NUC2 1H  
CPDPRG2 waltz16  
PCPD2 90.00 usec  
PLW2 22.00000000 W  
PLW12 0.41091001 W  
PLW13 0.33284000 W

F2 - Processing parameters  
SI 32768  
SF 100.6127690 MHz  
WDW EM  
SSB 0  
LB 6.00 MHz  
GB 0  
PC 1.40

MP-2  
proton\_su DMSO {C:\nmr-data} Student 17

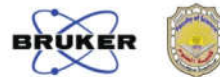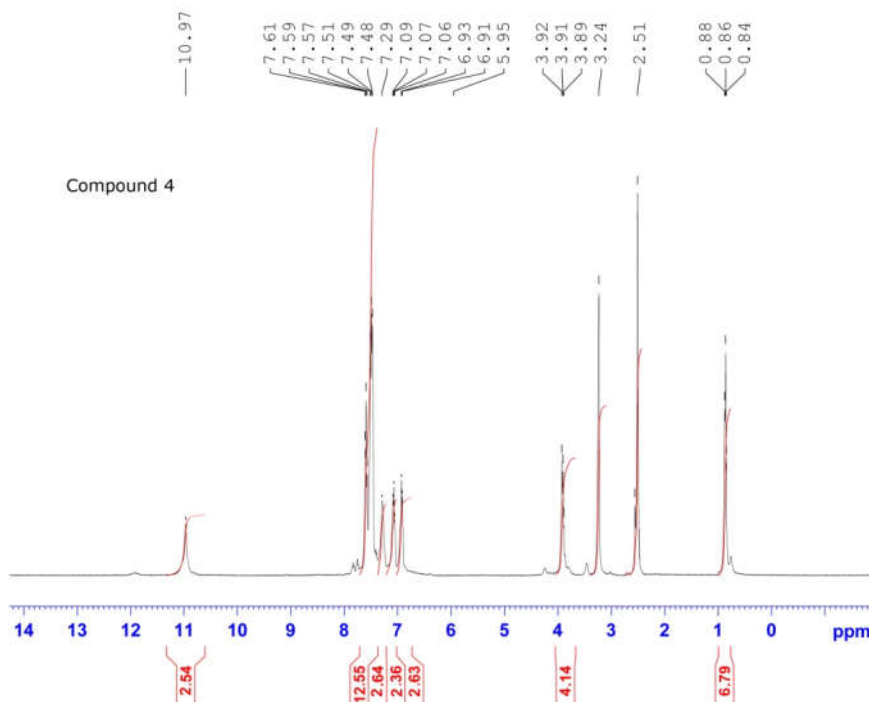

Current Data Parameters  
NAME Jul26-2017  
EXPNO 150  
PROCNO 1

F2 - Acquisition Parameters  
Date\_ 20170726  
Time 12.39  
INSTRUM spect  
PROBHD 5 mm PABBO BB/  
PULPROG zg30  
TD 65536  
SOLVENT DMSO  
NS 50  
DS 2  
SWH 8012.820 Hz  
FIDRES 0.122266 Hz  
AQ 4.0894465 sec  
RG 199.04  
DM 62.400 usec  
DE 6.50 usec  
TE 318.2 K  
D1 1.00000000 sec  
TDO 1

----- CHANNEL f1 -----  
SFO1 400.1324710 MHz  
NUC1 1H  
P1 12.00 usec  
PLW1 22.00000000 W

F2 - Processing parameters  
SI 65536  
SF 400.1300000 MHz  
WDW EM  
SSB 0  
LB 0.30 Hz  
GB 0  
PC 1.00

MP-2  
c13\_su DMSO {C:\nmr-data} Student 13

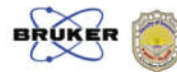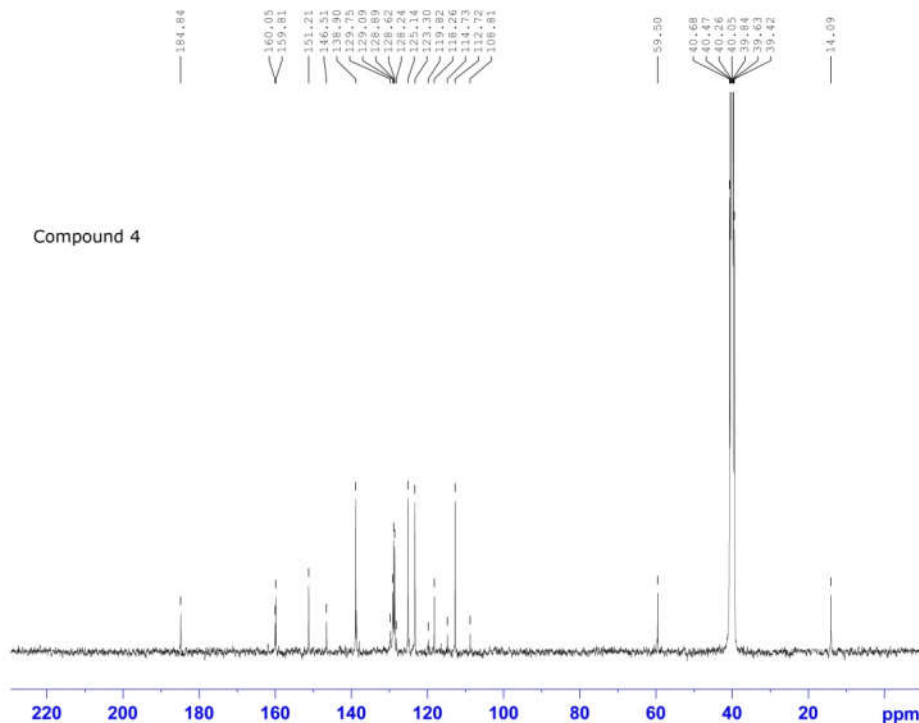

Current Data Parameters  
NAME Oct02-2017  
EXPNO 12  
PROCNO 1

F2 - Acquisition Parameters  
Date\_ 20171002  
Time 16.40  
INSTRUM spect  
PROBHD 5 mm PABBO BB/  
PULPROG xpgg30  
TD 65536  
SOLVENT DMSO  
NS 2500  
DS 4  
SWH 24038.461 Hz  
FIDRES 0.366798 Hz  
AQ 1.3631488 sec  
RG 158.76  
DM 20.800 usec  
DE 6.50 usec  
TE 318.2 K  
D1 2.00000000 sec  
D11 0.03000000 sec  
TDO 1

----- CHANNEL f1 -----  
SFO1 100.6238364 MHz  
NUC1 13C  
P1 9.50 usec  
PLW1 56.00000000 W

----- CHANNEL f2 -----  
SFO2 400.1316005 MHz  
NUC2 1H  
CPDPRG2 waltz16  
PCPD2 90.00 usec  
PLW2 22.00000000 W  
PLW12 0.41091001 W  
PLW13 0.33284000 W

F2 - Processing parameters  
SI 32768  
SF 100.6127690 MHz  
WDW EM  
SSB 0  
LB 6.00 Hz  
GB 0  
PC 1.40

MP-6  
proton\_su DMSO {C:\nmr-data} Student 22

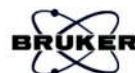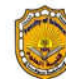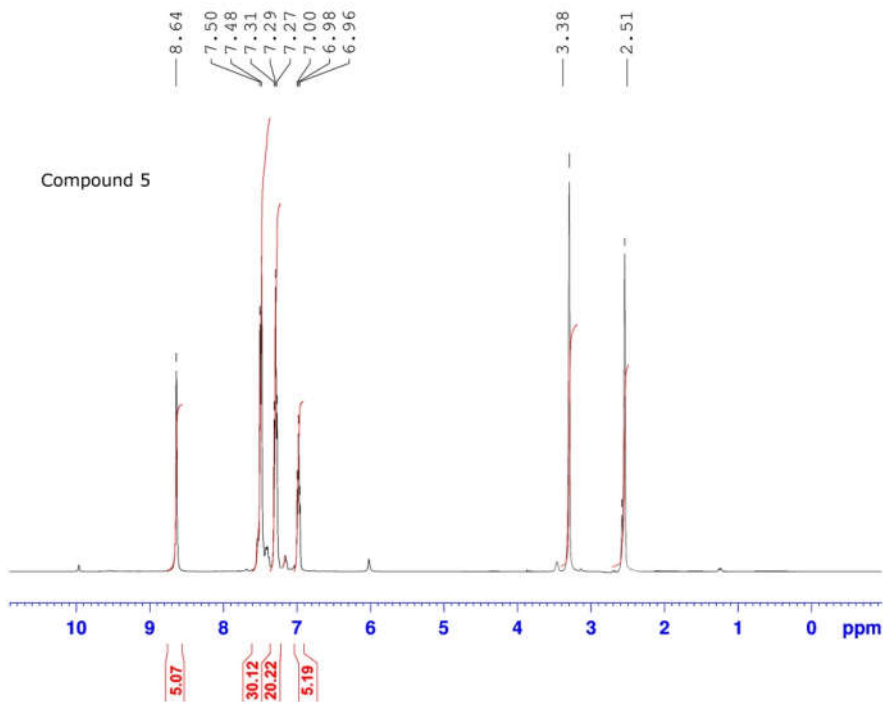

Current Data Parameters  
NAME Dec17-2017  
EXPNO 20  
PROCNO 1

F2 - Acquisition Parameters  
Date\_ 20171217  
Time 12.57  
INSTRUM spect  
PROBHD 5 mm PABBO BB/  
PULPROG zg30  
TD 65536  
SOLVENT DMSO  
NS 100  
DS 2  
SWH 8012.820 Hz  
FIDRES 0.122266 Hz  
AQ 4.0894465 sec  
RG 49.89  
DW 62.400 usec  
DE 6.50 usec  
TE 308.2 K  
D1 1.00000000 sec  
TD0 1

===== CHANNEL f1 =====  
SFO1 400.1324710 MHz  
NUC1 1H  
P1 12.00 usec  
PLW1 22.00000000 W

F2 - Processing parameters  
SI 65536  
SF 400.1300000 MHz  
WDW EM  
SSB 0  
LB 0.30 Hz  
GB 0  
PC 1.00

MP-6  
c13\_su DMSO {C:\nmr-data} Student 10

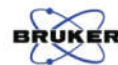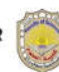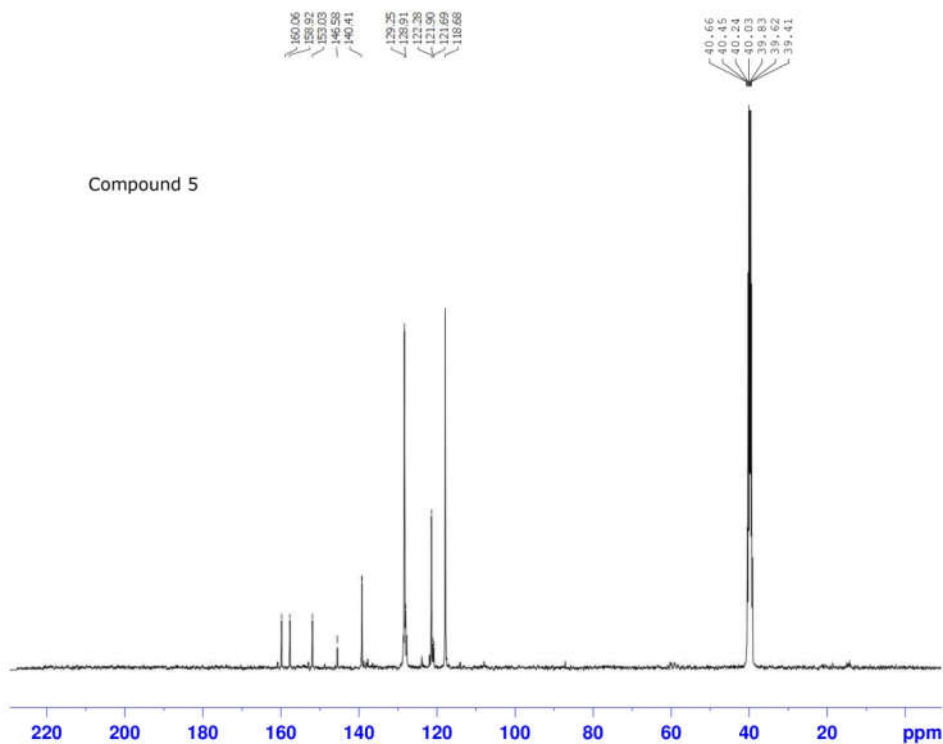

Current Data Parameters  
NAME Dec21-2017  
EXPNO 90  
PROCNO 1

F2 - Acquisition Parameters  
Date\_ 20171221  
Time 12.44  
INSTRUM spect  
PROBHD 5 mm PABBO BB/  
PULPROG zgpg30  
TD 65536  
SOLVENT DMSO  
NS 1100  
DS 4  
SWH 24038.461 MHz  
FIDRES 0.366798 MHz  
AQ 1.3631488 sec  
RG 158.76  
DW 20.800 usec  
DE 6.50 usec  
TE 303.1 K  
D1 2.00000000 sec  
D11 0.03000000 sec  
TD0 1

===== CHANNEL f1 =====  
SFO1 100.6238364 MHz  
NUC1 13C  
P1 9.50 usec  
PLW1 56.00000000 W

===== CHANNEL f2 =====  
SFO2 400.1316005 MHz  
NUC2 1H  
CPDPRG2 waltz16  
PCPD2 90.00 usec  
PLW2 22.00000000 W  
PLW12 0.41091001 W  
PLW13 0.33284000 W

F2 - Processing parameters  
SI 32768  
SF 100.6127690 MHz  
WDW EM  
SSB 0  
LB 6.00 MHz  
GB 0  
PC 1.40

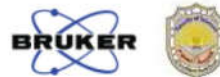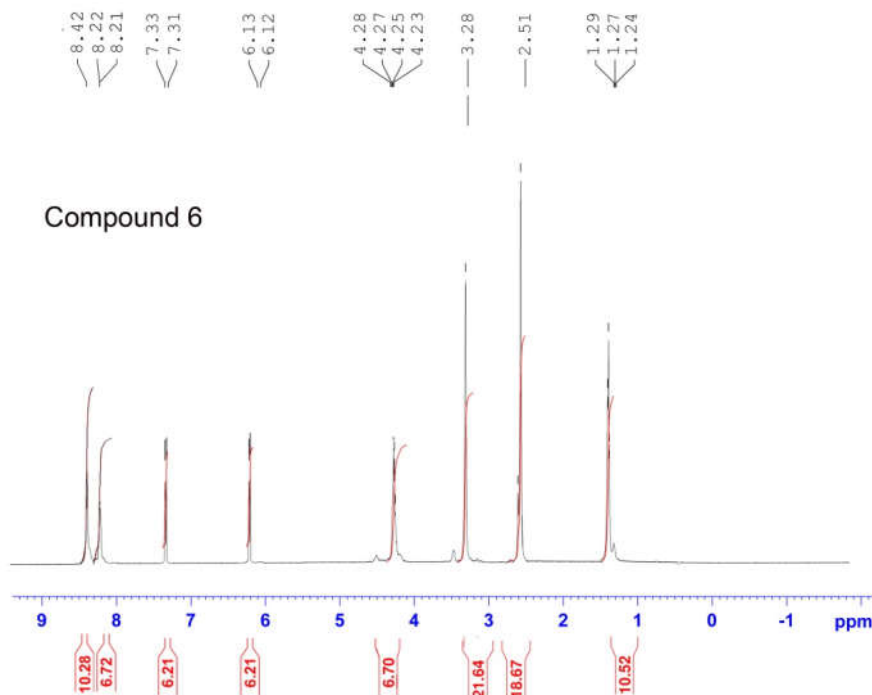

Current Data Parameters  
NAME Sep20-2017  
EXPNO 40  
PROCNO 1

F2 - Acquisition Parameters  
Date\_ 20170920  
Time 10.04  
INSTRUM spect  
PROBHD 5 mm PABBO BB/  
PULPROG zg30  
TD 65536  
SOLVENT DMSO  
NS 20  
DS 2  
SWH 8012.820 Hz  
FIDRES 0.122266 Hz  
AQ 4.0894465 sec  
RG 199.04  
DW 62.400 usec  
DE 6.50 usec  
TE 308.1 K  
D1 1.00000000 sec  
TD0 1

===== CHANNEL f1 =====  
SFO1 400.1324710 MHz  
NUC1 1H  
P1 12.00 usec  
PLW1 22.00000000 W

F2 - Processing parameters  
SI 65536  
SF 400.1300000 MHz  
WDW EM  
SSB 0  
LB 0.30 Hz  
GB 0  
PC 1.00

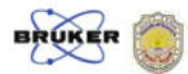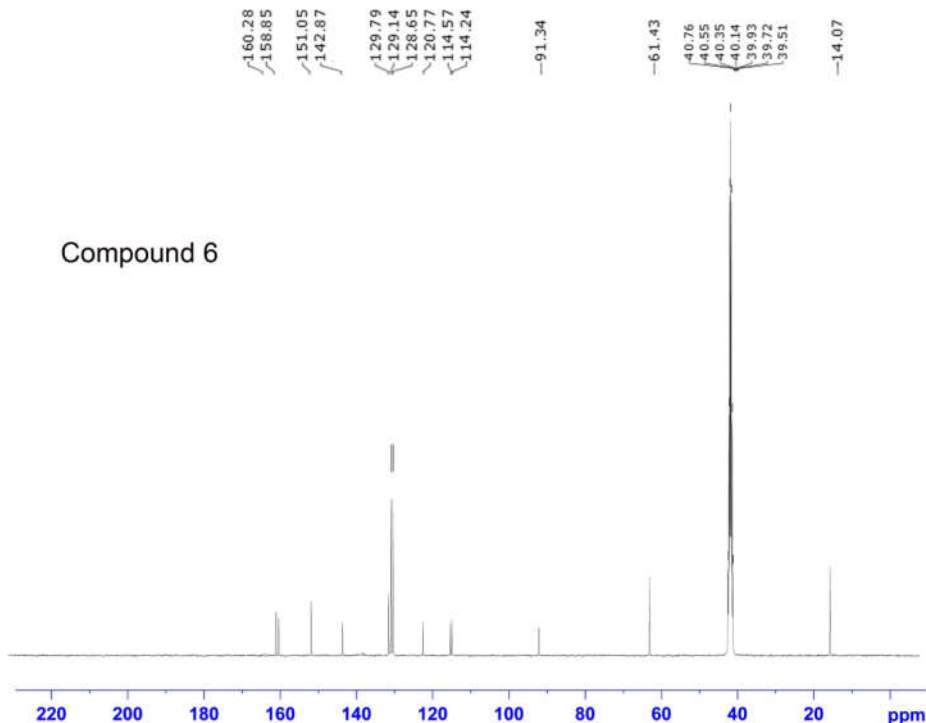

Current Data Parameters  
NAME Oct02-2017  
EXPNO 40  
PROCNO 1

F2 - Acquisition Parameters  
Date\_ 20171002  
Time 23.30  
INSTRUM spect  
PROBHD 5 mm PABBO BB/  
PULPROG zgpg30  
TD 65536  
SOLVENT DMSO  
NS 2400  
DS 4  
SWH 24038.461 Hz  
FIDRES 0.366798 Hz  
AQ 1.3631488 sec  
RG 199.04  
DW 20.800 usec  
DE 6.50 usec  
TE 318.2 K  
D1 2.00000000 sec  
D11 0.03000000 sec  
TD0 1

===== CHANNEL f1 =====  
SFO1 100.6238364 MHz  
NUC1 13C  
P1 9.50 usec  
PLW1 56.00000000 W

===== CHANNEL f2 =====  
SFO2 400.1316005 MHz  
NUC2 1H  
CPDPRG2 waltz16  
PCPD2 90.00 usec  
PLW2 22.00000000 W  
PLW12 0.41091001 W  
PLW13 0.33284000 W

F2 - Processing parameters  
SI 32768  
SF 100.6127690 MHz  
WDW EM  
SSB 0  
LB 6.00 Hz  
GB 0  
PC 1.40

mp-4  
proton\_su DMSO {C:\nmr-data} Student 3

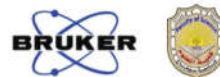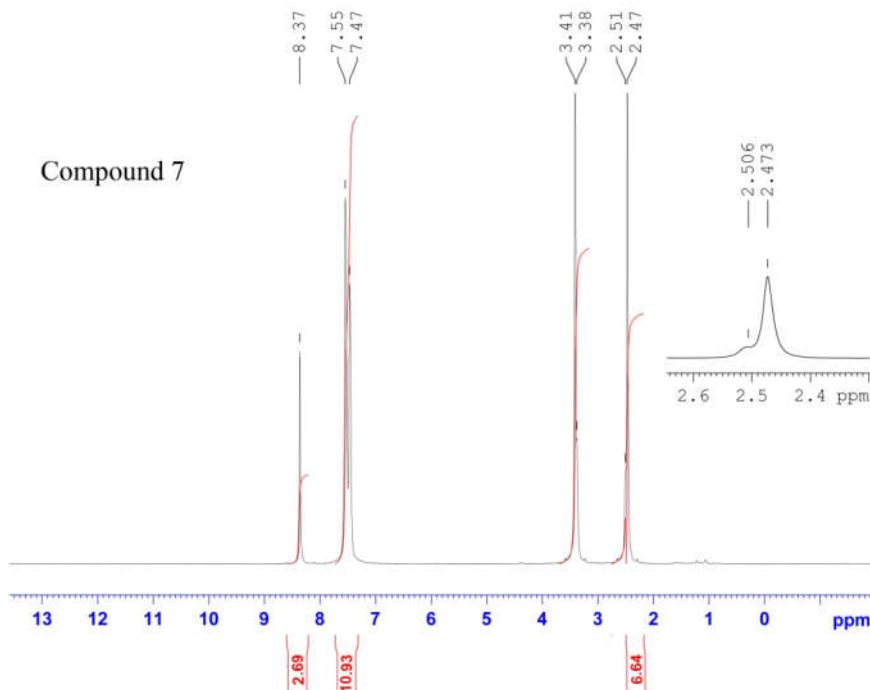

Current Data Parameters  
NAME Dec20-2017  
EXPNO 10  
PROCNO 1

F2 - Acquisition Parameters  
Date\_ 20171220  
Time\_ 11.47  
INSTRUM spect  
PROBHD 5 mm PABBO BB/  
PULPROG zg30  
TD 65536  
SOLVENT DMSO  
NS 20  
DS 2  
SWH 8012.820 Hz  
FIDRES 0.122266 Hz  
AQ 4.0894465 sec  
RG 68.22  
DW 62.400 usec  
DE 6.50 usec  
TE 293.5 K  
D1 1.00000000 sec  
TD0 1

===== CHANNEL f1 =====  
SFO1 400.1324710 MHz  
NUC1 1H  
P1 12.00 usec  
PLM1 22.00000000 W

F2 - Processing parameters  
SI 65536  
SF 400.1300000 MHz  
WDW EM  
SSB 0  
LB 0.30 Hz  
GB 0  
PC 1.00

MP-4  
c13\_su DMSO {C:\nmr-data} Student 13

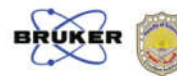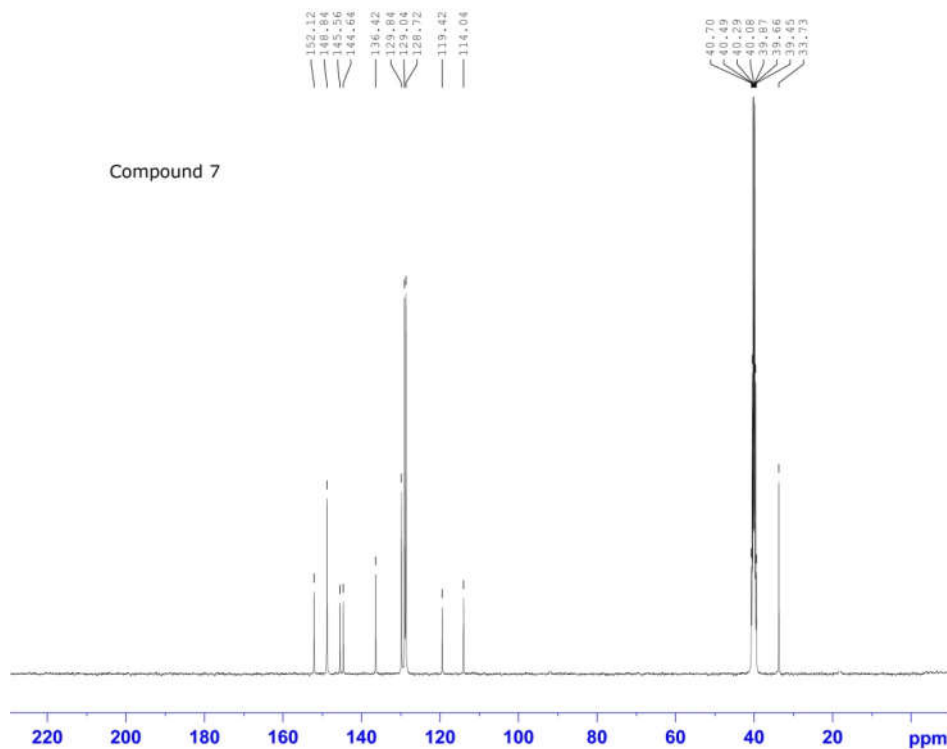

Current Data Parameters  
NAME Jan17-2018  
EXPNO 350  
PROCNO 1

F2 - Acquisition Parameters  
Date\_ 20180118  
Time\_ 0.15  
INSTRUM spect  
PROBHD 5 mm PABBO BB/  
PULPROG zgpg30  
TD 65536  
SOLVENT DMSO  
NS 1200  
DS 4  
SWH 24038.461 Hz  
FIDRES 0.366798 Hz  
AQ 1.3631488 sec  
RG 100.43  
DW 20.800 usec  
DE 6.50 usec  
TE 308.1 K  
D1 2.00000000 sec  
D11 0.03000000 sec  
TD0 1

===== CHANNEL f1 =====  
SFO1 100.6238364 MHz  
NUC1 13C  
P1 9.50 usec  
PLM1 56.00000000 W

===== CHANNEL f2 =====  
SFO2 400.1316005 MHz  
NUC2 1H  
CPDPRG[2] waltz16  
PCPD2 90.00 usec  
PLW2 22.00000000 W  
PLW12 0.41091001 W  
PLW13 0.33284000 W

F2 - Processing parameters  
SI 32768  
SF 100.6127690 MHz  
WDW EM  
SSB 0  
LB 6.00 Hz  
GB 0  
PC 1.40
